# Supplementary material for: Development of a patient decision aid for children and adolescents following anterior cruciate ligament rupture: an international mixed-methods study
Source: PubMed Central journal article supplement — BMJ Open. 2024 Apr 29;14(4):e081421. doi: 10.1136/bmjopen-2023-081421 (PMC11086191; doi:10.1136/bmjopen-2023-081421), 2024-04-29
Supplement: bmjopen-2023-081421supp001.pdf [file bmjopen-2023-081421supp001.pdf]

What information is important when considering early anterior cruciate ligament (ACL) reconstruction in children?

**For recruitment via social media**

**Consent section**

1. Please make sure you have read the Children and Adolescent [Participant information statement](#) before starting the survey.
2. CHILDREN AND ADOLESCENT PARTICIPANT CONSENT FORM

**PARTICIPANT CONSENT FORM**

**What information is important when considering early anterior cruciate ligament (ACL) reconstruction in children?**

By saying yes to being in this study, I am saying that:

Tick/initial boxes

- I know what I will be asked to do and have been given a Study Information Sheet to keep.
  - I know that this study is about what information is important for children before deciding to have early ACL reconstruction surgery or rehabilitation with the option for delayed ACL reconstruction.
  - Someone has talked to me about the study and what it means for me.
  - I know that I will be asked to answer a questionnaire (5-minutes) before I attend an interview to provide feedback on educational information of treatment options following ACL injury (online, via telephone or in person if the COVID-19 situation allows) that will last 30 minutes.
  - I know that I don't have to be in the study if I don't want to.
  - I know that I can choose not to talk about something if I don't want to.
  - I have been asked if it is ok or not ok to record what I say.
  - I have been told that I can change my mind at any time if I don't want to take part anymore.
  - I have been told that if I say yes or no it won't change how the study team feel about me.
  - I know that what I say or do in this study is private and when the study team write about what they learn they won't use my name or anything that could tell other people who I am.
  - I understand that after I sign and return this consent form it will be kept by the researcher, and that I can ask for a copy at any time.
- 
- Yes, I would be happy to participate in this study
  - No, I would prefer not to participate in this study

What information is important when considering early anterior cruciate ligament (ACL) reconstruction in children? v3, 23/3/2022

What information is important when considering early anterior cruciate ligament (ACL) reconstruction in children?

3. I would like to be emailed a copy of the study results:

Yes

No

If YES, my email address is \_\_\_\_\_

4. I consent to the future use of any data I provide for research purposes. I understand that before the investigators or their collaborators use any data that I provide, they must seek additional ethics approval.

Yes

No

What information is important when considering early anterior cruciate ligament (ACL) reconstruction in children? v3,  
23/3/2022

What information is important when considering early anterior cruciate ligament (ACL) reconstruction in children?

### **Pre-interview Questionnaire**

**Study ID:** \_\_\_\_\_

Thank you for your participation in this study, which is investigating what information is important when considering early anterior cruciate ligament (ACL) reconstruction in children.

We would like you to answer a few questions before the interview. This should not take more than 5-minutes.

#### **First some quick questions about you...**

1. Please indicate your gender:

- Female
- Male
- Non-binary

2. Please indicate your age: [free text response]

\_\_\_\_\_

3. In which country were you born? [free text response]

4. Are you currently at school?

- Yes
- No

If Yes, What Grade are you in at school? \_\_\_\_\_

If No, What Grade did you finish/leave school? \_\_\_\_\_

5. Do you work?

- Yes
- No

If Yes,

- Part-time
- Full-time

What type of work do you do? \_\_\_\_\_

6. How long ago did you rupture your ACL (weeks, months or years)?

\_\_\_\_\_

7. When you ruptured your ACL, did you also damage any other structures in the knee (e.g., Meniscus or other ligament damage)?

- Yes
- No (skip to question 8)

What information is important when considering early anterior cruciate ligament (ACL) reconstruction in children? v3, 23/3/2022

What information is important when considering early anterior cruciate ligament (ACL) reconstruction in children?

Unsure

Please specify the structures you damaged. Please select all that apply:

- Medial collateral ligament (MCL)
- Lateral collateral ligament (LCL)
- Posterior cruciate ligament (PCL)
- Medial meniscus
- Lateral meniscus
- Cartilage damage
- I am unsure of the structure

8. Did you have an ACL reconstruction surgery?

- Yes
- No > go to question 10

> If 'Yes' did you re-rupture your ACL after surgery?

- Yes
- No

> If 'Yes', did you have another ACL reconstruction?

- Yes
- No

9. How long ago did you have your most recent ACL reconstruction surgery?

- <1 month ago
- 1-3 months ago
- 4-6 months ago
- 6-12 months ago
- 12-24 months ago
- >24 months ago

10. Please indicate in the spaces below the HIGHEST level of activity that you participated in BEFORE YOUR INJURY and the highest level you can participate in CURRENTLY.

BEFORE INJURY: Level \_\_\_\_\_ CURRENT: Level \_\_\_\_\_

What information is important when considering early anterior cruciate ligament (ACL) reconstruction in children?

Please choose one of the following which best describes your current activity level.

|                       |          |                                                                                                                                                                                                          |
|-----------------------|----------|----------------------------------------------------------------------------------------------------------------------------------------------------------------------------------------------------------|
| <input type="radio"/> | Level 10 | Competitive Sports(Soccer, Football, Rugby (national elite)                                                                                                                                              |
| <input type="radio"/> | Level 9  | Competitive Sports(Soccer, Football, Rugby (lower divisions), hockey, wrestling, gymnastics)                                                                                                             |
| <input type="radio"/> | Level 8  | Competitive Sports(Racquetball, Squash, Track and Field, Alpine Skiing)                                                                                                                                  |
| <input type="radio"/> | Level 7  | Competitive Sports(Tennis, Athletics(Running), Handball, Basketball, Motorcross, Cross country track)<br>Recreational Sports (Soccer, Football, Hockey, Squash, Athletics(jumping), Cross country track) |
| <input type="radio"/> | Level 6  | Recreational Sports (Tennis, Handball, Basketball, Alpine skiing, Jogging 5X/week)                                                                                                                       |
| <input type="radio"/> | Level 5  | Work (Heavy Labor)<br>Competitive Sports (Cycling, X-country Skiing) Recreational (Jogging on uneven ground 2x/week)                                                                                     |
| <input type="radio"/> | Level 4  | Work (Moderately Heavy Labor (truck driving, etc)<br>Recreational Sports (Cycling, Cross Country Skiing, Jogging on even ground 2X/week)                                                                 |
| <input type="radio"/> | Level 3  | Work (Light Labor)<br>Comp & Rec Sports (Swimming), Hiking, Backpacking                                                                                                                                  |
| <input type="radio"/> | Level 2  | Work (Light Labor)<br>Walking on uneven ground possible but impossible to backpack or hike                                                                                                               |
| <input type="radio"/> | Level 1  | Work (Light Labor)<br>Walking on even ground possible                                                                                                                                                    |
| <input type="radio"/> | Level 0  | Sick leave or disability pension because of knee problems                                                                                                                                                |

11. Which one factor most influenced your decision to have (or not have) an ACL reconstruction?

- Pain
- Return to sport
- Prevent further damage
- Age
- Recommendation from a health professional (e.g., an Orthopaedic surgeon or Physiotherapist)
- Online information
- Someone you know (e.g., a Friend)
- I don't know

12. How happy were you with your treatment choice (either ACL reconstruction or non-surgical management)?

- Extremely unhappy
- Somewhat unhappy
- Neither happy or unhappy
- Somewhat happy
- Extremely happy

Finally, when are the best times to schedule you for an online interview...

Please provide below your best contact details for a researcher from the University of Sydney to contact you and arrange the follow-up interview:

Name: \_\_\_\_\_

Email: \_\_\_\_\_

What information is important when considering early anterior cruciate ligament (ACL) reconstruction in children? v3, 23/3/2022

What information is important when considering early anterior cruciate ligament (ACL) reconstruction in children?

Best contact telephone number: \_\_\_\_\_

Best time/s to call: \_\_\_\_\_

Please mark the times that are suitable to arrange an interview in the boxes below:

|           | Monday | Tuesday | Wednesday | Thursday | Friday |
|-----------|--------|---------|-----------|----------|--------|
| 8 – 10am  |        |         |           |          |        |
| 10 – 12pm |        |         |           |          |        |
| 12 – 2pm  |        |         |           |          |        |
| 2 – 4pm   |        |         |           |          |        |
| 4 – 6pm   |        |         |           |          |        |

**Thank you for completing the questionnaire.**

What information is important when considering early anterior cruciate ligament (ACL) reconstruction in children? v3,  
23/3/2022
