# Supplementary material for: Development of a patient decision aid for children and adolescents following anterior cruciate ligament rupture: an international mixed-methods study
Source: PubMed Central journal article supplement — BMJ Open. 2024 Apr 29;14(4):e081421. doi: 10.1136/bmjopen-2023-081421 (PMC11086191; doi:10.1136/bmjopen-2023-081421), 2024-04-29
Supplement: bmjopen-2023-081421supp008.pdf [file bmjopen-2023-081421supp008.pdf]

### Supplementary File 10: Acceptability questionnaire for children, adolescents, parents, and adults

We would like to know what you think about the patient decision aid you have just read.

Which participant group are you?

- Parent/Gaurdian
- Child or Adolescent
- Adult

1. Please rate each section by circling 'poor', 'fair', 'good', or 'excellent' to show what you think about the way the information was presented on:

| Who should read this decision aid?                                                   | Poor | Fair | Good | Excellent |
|--------------------------------------------------------------------------------------|------|------|------|-----------|
| Diagram of management options following ACL rupture                                  | Poor | Fair | Good | Excellent |
| The treatment options covered in this decision aid                                   | Poor | Fair | Good | Excellent |
| Comparing benefits and harms of each management option for those aged < 18 years old | Poor | Fair | Good | Excellent |
| Summary of benefits and harms of each option                                         | Poor | Fair | Good | Excellent |

2. The length of the decision aid was:
  - a. Too long
  - b. Too short
  - c. Just right
3. The amount of information was:
  - a. Just right
  - b. Too much
  - c. Too little
4. I found the decision aid:
  - a. Balanced
  - b. Slanted towards rehab only (or delayed ACL surgery)
  - c. Slanted towards ACL reconstruction surgery (early ACL surgery)
5. Would you find (or would you have found) this decision aid useful when/if you were making your decision about ACL reconstruction surgery?
  - a. Not at all useful
  - b. Slightly useful
  - c. Moderately useful
  - d. Very useful

- e. Extremely useful
6. Did this decision aid/would this decision aid make your decision to have ACL reconstruction surgery...?
- a. Easier (option to comment)
  - b. More difficult (option to comment)
