# Supplementary material for: Development of a patient decision aid for children and adolescents following anterior cruciate ligament rupture: an international mixed-methods study
Source: PubMed Central journal article supplement — BMJ Open. 2024 Apr 29;14(4):e081421. doi: 10.1136/bmjopen-2023-081421 (PMC11086191; doi:10.1136/bmjopen-2023-081421), 2024-04-29
Supplement: bmjopen-2023-081421supp009.pdf [file bmjopen-2023-081421supp009.pdf]

### Supplementary File 11: Acceptability questionnaire for Health Professionals

We would like to know what you think about the patient decision aid you have just read.

Please rate each section by selecting 'strongly agree', 'agree', 'neutral', 'disagree' or 'strongly disagree' to show what you think about the way the information was presented on:

| <b>In general:</b>                                                                                               | <b>Strongly agree</b> | <b>Agree</b> | <b>Neutral</b> | <b>Disagree</b> | <b>Strongly disagree</b> |
|------------------------------------------------------------------------------------------------------------------|-----------------------|--------------|----------------|-----------------|--------------------------|
| It will be easy for me to use                                                                                    | 1                     | 2            | 3              | 4               | 5                        |
| It is easy for me to understand                                                                                  | 1                     | 2            | 3              | 4               | 5                        |
| It will be easy for me to experiment with using it before making a final decision to adopt it                    | 1                     | 2            | 3              | 4               | 5                        |
| The results of using the decision aid will be easy to see                                                        | 1                     | 2            | 3              | 4               | 5                        |
| This decision aid is better than how I usually go about helping patients decide about ACL reconstruction surgery | 1                     | 2            | 3              | 4               | 5                        |
| This decision aid is compatible with the way I think ACL ruptures should be managed                              | 1                     | 2            | 3              | 4               | 5                        |
| Compared with my usual approach, this decision aid will result in my patients making more informed decisions     | 1                     | 2            | 3              | 4               | 5                        |
| Using this decision aid will save me time                                                                        | 1                     | 2            | 3              | 4               | 5                        |
| This decision aid is a reliable method of helping patients make decisions about ACL reconstruction surgery       | 1                     | 2            | 3              | 4               | 5                        |
| Pieces or components of the decision aid can be used by themselves                                               | 1                     | 2            | 3              | 4               | 5                        |
| This type of decision aid is suitable for helping patients make value laden choices                              | 1                     | 2            | 3              | 4               | 5                        |
| This decision aid complements my usual approach                                                                  | 1                     | 2            | 3              | 4               | 5                        |
| Using this decision aid does not involve making major changes to the way I usually do things                     | 1                     | 2            | 3              | 4               | 5                        |
| There is a high probability that using this decision aid may cause/result in more benefit than harm              | 1                     | 2            | 3              | 4               | 5                        |
